# Supplementary material for: MMP-14 overexpression correlates with the neurodegenerative process in familial amyloidotic polyneuropathy
Source: PubMed Central journal article supplement (PMC5665453; doi:10.1242/dmm.028571), 2017-10-01
Supplement: dmm-10-028571-s1.pdf [file dmm-10-028571-s1.pdf]

A)

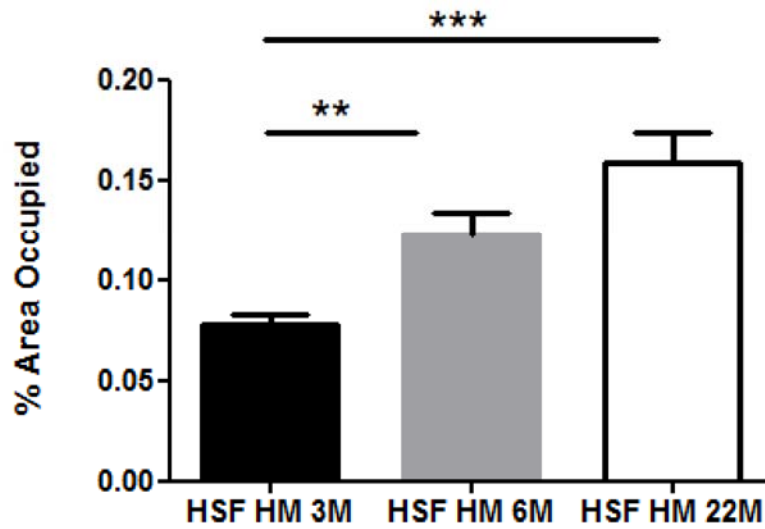

**Supplemental Figure 1:** MMP-14 upregulation and non-fibrillar TTR deposition in a naïve mouse model. **A)** Representative images obtained with IHC for MMP-14 using Hsf/V30M mouse model with 3, 6 and 22 months of age (n=6), showing an increase of MMP-14 expression in animals with 22 months. Chart represents quantification of immunohistochemical images (scale bar 100µm) and data was analyzed using one-way ANOVA followed by Bonferroni post-test and represented as mean± SEM (\*\**p* <0.001).
